# Supplementary material for: Whole-Genome Analysis of Influenza A(H1N1)pdm09 Viruses in Cameroon (2019–2024) Using Nanopore Sequencing
Source: Research Square preprint supplement (doi:10.21203/rs.3.rs-7684927/v1), 2025-10-29
Supplement: Supplementary file 1 [file 1c9cf1d2d5dde05244f8585b.docx]

**Additional file 1**. GenBank Isolate ID

| **NAME** | **GenBank ID** |
| --- | --- |
| SUB15684308 Seq1 | PX446230 |
| SUB15684308 Seq2 | PX446231 |
| SUB15685102 Seq3 | PX446382 |
| SUB15685102 Seq4 | PX446383 |
| SUB15685102 Seq5 | PX446384 |
| SUB15685102 Seq6 | PX446385 |
| SUB15685102 Seq7 | PX446386 |
| SUB15685102 Seq8 | PX446387 |
| SUB15685102 Seq9 | PX446388 |
| SUB15685102 Seq10 | PX446389 |
| SUB15685102 Seq11 | PX446390 |
| SUB15685102 Seq12 | PX446391 |
| SUB15685102 Seq13 | PX446392 |
| SUB15685102 Seq14 | PX446393 |
| SUB15685102 Seq15 | PX446394 |
| SUB15685102 Seq16 | PX446395 |
| SUB15685102 Seq17 | PX446396 |
| SUB15685102 Seq18 | PX446397 |
| SUB15685102 Seq19 | PX446398 |
| SUB15685102 Seq20 | PX446399 |
| SUB15685102 Seq21 | PX446400 |
| SUB15685102 Seq22 | PX446401 |
| SUB15685102 Seq23 | PX446402 |
| SUB15685102 Seq24 | PX446403 |
| SUB15685102 Seq25 | PX446404 |
| SUB15685102 Seq26 | PX446405 |
| SUB15685102 Seq27 | PX446406 |
| SUB15685102 Seq28 | PX446407 |
| SUB15685102 Seq29 | PX446408 |
| SUB15685102 Seq30 | PX446409 |
| SUB15685102 Seq31 | PX446410 |
| SUB15685102 Seq32 | PX446411 |
| SUB15685102 Seq33 | PX446412 |
| SUB15685102 Seq34 | PX446413 |
| SUB15685102 Seq35 | PX446414 |
| SUB15685102 Seq36 | PX446415 |
| SUB15685102 Seq37 | PX446416 |
| SUB15685102 Seq38 | PX446417 |
| SUB15685102 Seq39 | PX446418 |
| SUB15685102 Seq40 | PX446419 |
| SUB15685102 Seq41 | PX446420 |
| SUB15685102 Seq42 | PX446421 |
| SUB15685102 Seq43 | PX446422 |
| SUB15685102 Seq44 | PX446423 |
| SUB15685102 Seq45 | PX446424 |
| SUB15685102 Seq46 | PX446425 |
| SUB15685102 Seq47 | PX446426 |
| SUB15685102 Seq48 | PX446427 |
| SUB15685102 Seq49 | PX446428 |
| SUB15685102 Seq50 | PX446429 |
| SUB15685102 Seq51 | PX446430 |
| SUB15685102 Seq52 | PX446431 |
| SUB15685102 Seq53 | PX446432 |
| SUB15685102 Seq54 | PX446433 |
| SUB15685102 Seq55 | PX446434 |
| SUB15685102 Seq56 | PX446435 |
| SUB15685102 Seq57 | PX446436 |
| SUB15685102 Seq58 | PX446437 |
| SUB15685102 Seq59 | PX446438 |
| SUB15685102 Seq60 | PX446439 |
| SUB15685102 Seq61 | PX446440 |
| SUB15685102 Seq62 | PX446441 |
